# Supplementary material for: Systematic discovery of biomolecular condensate-specific protein phosphorylation
Source: PubMed Central journal article supplement (PMC9512703; doi:10.1038/s41589-022-01062-y), 2022-07-21

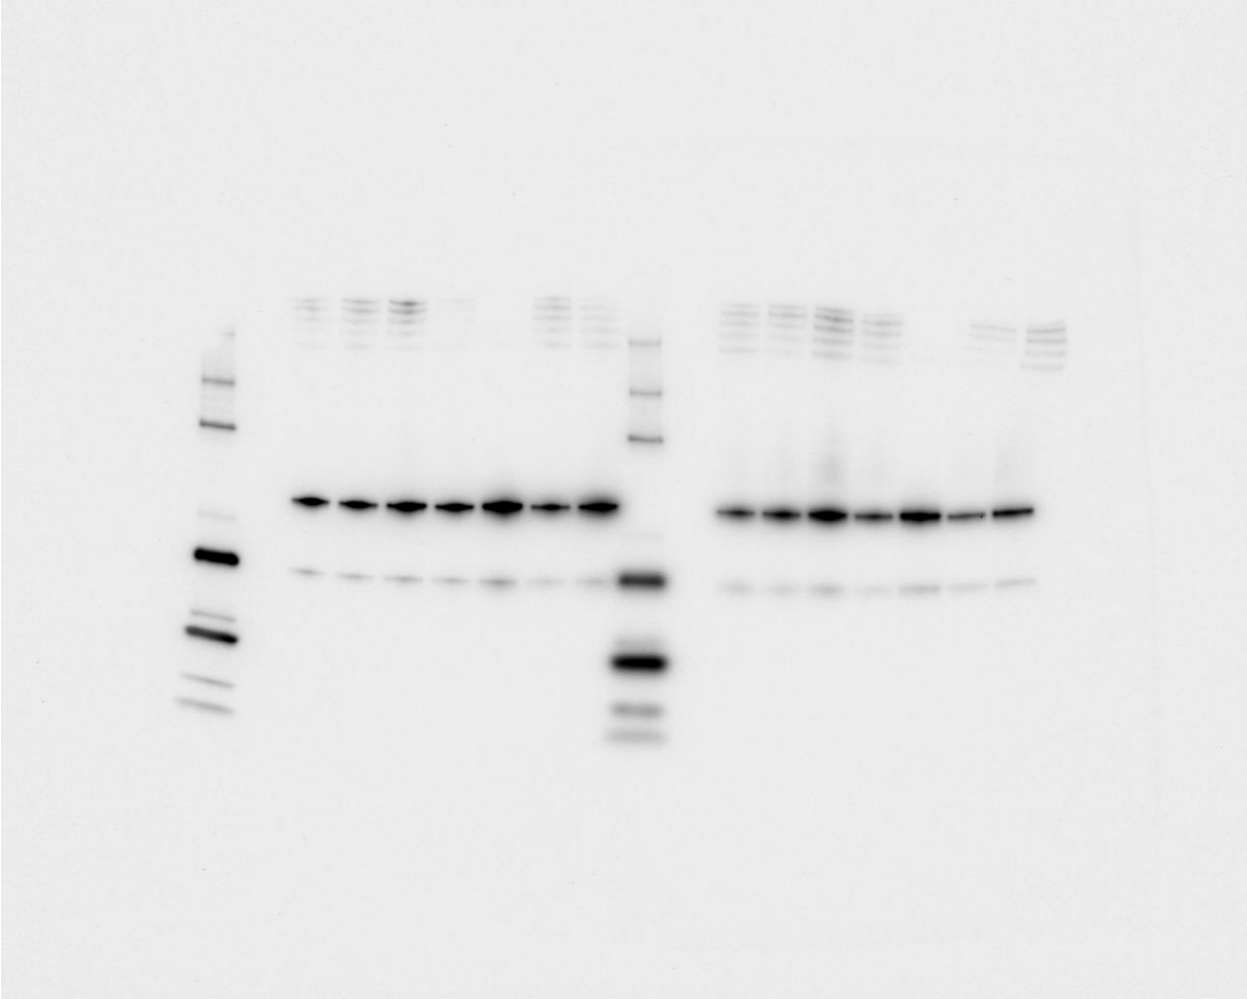

Supplement: 41589_2022_1062_MOESM27_ESM.pdf [file 41589_2022_1062_MOESM27_ESM.pdf]
